# Supplementary material for: No evidence for individual recognition in threespine or ninespine sticklebacks (Gasterosteus aculeatus or Pungitius pungitius)
Source: R Soc Open Sci. 2020 Jul 8;7(7):191703. doi: 10.1098/rsos.191703 (PMC7428269; doi:10.1098/rsos.191703)
Supplement: Raw data [file rsos191703supp1.xlsx]

## Sheet: Sheet1
Data for: No evidence for individual recognition in threespine or ninespine sticklebacks (Gasterosteus aculeatus and Pungitius pungitius)
Webster, MM & Laland, KN
Threespine stickleback, stimulus: conspecific
Before green light		After green light
Unrewarded	Rewarded	Unrewarded	Rewarded	Test order	Side of reward	First choice (before green light)	First choice (after gren light)	notes
11	9	14	12	After	Left	Unrewarded	Rewarded	n=28, 2 fish died
8	12	12	5	After	Left	Unrewarded	Rewarded
13	4	12	17	Before	Left	Unrewarded	Rewarded
7	19	19	10	Before	Left	Rewarded	Unrewarded
18	8	10	15	Before	Right	Rewarded	Unrewarded
8	7	14	9	Before	Left	Rewarded	Unrewarded
6	22	15	10	Before	Right	Unrewarded	Unrewarded
9	14	16	12	After	Right	Rewarded	Unrewarded
22	6	11	18	After	Left	Unrewarded	Rewarded
16	8	9	16	Before	Left	Unrewarded	Unrewarded
7	17	6	17	Before	Right	Rewarded	Rewarded
4	23	12	15	After	Right	Unrewarded	Rewarded
11	8	8	15	After	Left	Rewarded	Rewarded
18	9	16	11	Before	Left	Rewarded	Rewarded
12	2	19	10	After	Left	Rewarded	Unrewarded
7	10	12	12	After	Left	Unrewarded	Unrewarded
13	14	19	10	Before	Left	Unrewarded	Unrewarded
15	5	12	14	Before	Right	Rewarded	Unrewarded
2	6	12	15	After	Left	Unrewarded	Unrewarded
6	10	11	12	Before	Right	Unrewarded	Unrewarded
7	8	19	6	After	Right	Unrewarded	Unrewarded
19	8	12	16	Before	Right	Unrewarded	Rewarded
10	4	12	10	After	Right	Unrewarded	Unrewarded
10	7	10	4	Before	Left	Unrewarded	Rewarded
12	8	15	13	Before	Right	Unrewarded	Rewarded
5	19	13	11	After	Right	Unrewarded	Unrewarded
16	4	10	17	After	Left	Rewarded	Rewarded
5	14	12	17	After	Left	Rewarded	Unrewarded
Ninespine stickleback, stimulus: conspecific
Before green light		After green light
Unrewarded	Rewarded	Unrewarded	Rewarded	Test order	Side of reward	First choice (before green light)	First choice (after gren light)	notes
2	8	15	6	After	Right	Rewarded	Unrewarded
12	4	12	15	Before	Left	Rewarded	Unrewarded
15	12	15	11	After	Left	Rewarded	Rewarded
8	13	6	16	Before	Left	Rewarded	Unrewarded
19	6	14	10	Before	Right	Rewarded	Rewarded
6	12	10	8	After	Left	Unrewarded	Rewarded
12	10	12	17	Before	Right	Rewarded	Rewarded
14	10	18	11	Before	Left	Unrewarded	Unrewarded
3	17	21	0	Before	Right	Unrewarded	Unrewarded
0	21	12	15	Before	Left	Unrewarded	Unrewarded
11	8	6	15	Before	Left	Rewarded	Unrewarded
23	6	13	11	Before	Left	Unrewarded	Unrewarded
14	10	12	13	Before	Left	Unrewarded	Rewarded
12	2	10	19	After	Right	Unrewarded	Unrewarded
5	5	0	23	Before	Left	Rewarded	Unrewarded
16	3	20	5	After	Right	Unrewarded	Rewarded
30	0	17	10	Before	Right	Rewarded	Rewarded
8	12	14	10	After	Left	Rewarded	Rewarded
11	18	10	15	Before	Left	Rewarded	Rewarded
14	0	23	3	After	Left	Rewarded	Rewarded
9	12	12	15	After	Left	Rewarded	Unrewarded
17	3	2	11	Before	Right	Rewarded	Rewarded
5	1	11	11	After	Right	Rewarded	Unrewarded
11	4	16	12	After	Left	Rewarded	Unrewarded
13	7	12	14	After	Left	Unrewarded	Rewarded
19	7	14	11	After	Right	Unrewarded	Rewarded
7	22	15	6	After	Right	Rewarded	Unrewarded
4	25	10	14	Before	Right	Rewarded	Unrewarded
23	4	10	15	After	Right	Rewarded	Unrewarded
8	8	5	16	After	Left	Unrewarded	Rewarded
Threespine stickleback, stimulus: coloured landmark
Before green light		After green light
Unrewarded	Rewarded	Unrewarded	Rewarded	Landmark colour	Test order	Side of reward	First choice (before green light)	First choice (after gren light)
3	0	2	10	Yellow	Before	Left	Rewarded	Rewarded
6	2	8	14	Yellow	Before	Right	Rewarded	Rewarded
9	6	7	12	Yellow	Before	Right	Rewarded	Rewarded
10	3	0	14	Yellow	Before	Right	Unrewarded	Unrewarded
5	15	0	15	Yellow	Before	Right	Rewarded	Rewarded
9	9	12	9	Yellow	After	Right	Unrewarded	Rewarded
0	11	3	23	Yellow	After	Left	Unrewarded	Unrewarded
8	1	4	14	Yellow	Before	Right	Unrewarded	Rewarded
4	6	5	11	Yellow	Before	Left	Unrewarded	Rewarded
2	2	3	8	Yellow	After	Right	Unrewarded	Unrewarded
10	5	6	19	Yellow	Before	Right	Unrewarded	Unrewarded
11	5	8	11	Yellow	Before	Left	Rewarded	Unrewarded
4	9	10	16	Yellow	After	Left	Unrewarded	Rewarded
5	11	9	16	Yellow	After	Left	Unrewarded	Unrewarded
1	10	0	15	Yellow	After	Right	Unrewarded	Rewarded
5	6	0	18	Blue	After	Left	Unrewarded	Unrewarded
11	5	0	10	Blue	After	Right	Rewarded	Rewarded
10	9	4	13	Blue	After	Right	Rewarded	Rewarded
5	1	14	10	Blue	After	Left	Rewarded	Unrewarded
1	10	5	23	Blue	After	Left	Unrewarded	Rewarded
2	3	2	18	Blue	After	Left	Rewarded	Rewarded
1	8	1	7	Blue	Before	Left	Rewarded	Rewarded
0	9	11	7	Blue	After	Right	Rewarded	Unrewarded
1	12	8	14	Blue	After	Right	Rewarded	Rewarded
16	2	13	15	Blue	After	Left	Unrewarded	Rewarded
19	5	0	8	Blue	Before	Left	Unrewarded	Rewarded
5	5	2	21	Blue	Before	Left	Rewarded	Unrewarded
8	8	2	14	Blue	Before	Left	Unrewarded	Unrewarded
3	6	0	17	Blue	Before	Right	Rewarded	Unrewarded
6	15	4	20	Blue	Before	Left	Rewarded	Rewarded
Ninespine stickleback, stimulus: coloured landmark
Before green light		After green light
Unrewarded	Rewarded	Unrewarded	Rewarded	Landmark colour	Test order	Side of reward	First choice (before green light)	First choice (after gren light)
3	10	2	12	Yellow	After	Right	Rewarded	Rewarded
9	0	0	15	Yellow	After	Left	Unrewarded	Rewarded
6	5	3	5	Yellow	Before	Right	Unrewarded	Rewarded
7	3	14	10	Yellow	Before	Left	Unrewarded	Rewarded
2	6	2	21	Yellow	After	Left	Unrewarded	Rewarded
2	8	1	3	Yellow	Before	Right	Unrewarded	Rewarded
0	0	0	22	Yellow	After	Right	Rewarded	Unrewarded
9	2	0	8	Yellow	Before	Right	Rewarded	Unrewarded
3	2	11	7	Yellow	After	Left	Rewarded	Rewarded
6	1	4	8	Yellow	After	Right	Unrewarded	Unrewarded
8	4	5	18	Yellow	Before	Right	Rewarded	Unrewarded
8	8	5	24	Yellow	After	Left	Rewarded	Unrewarded
4	6	2	8	Yellow	After	Left	Unrewarded	Unrewarded
2	0	0	8	Yellow	Before	Left	Unrewarded	Unrewarded
10	8	7	18	Yellow	Before	Left	Unrewarded	Unrewarded
4	6	4	8	Blue	After	Left	Rewarded	Unrewarded
5	12	6	14	Blue	Before	Left	Rewarded	Rewarded
0	2	4	15	Blue	Before	Left	Unrewarded	Rewarded
0	8	2	10	Blue	After	Left	Rewarded	Rewarded
2	12	2	10	Blue	Before	Right	Unrewarded	Unrewarded
5	15	2	21	Blue	After	Left	Unrewarded	Rewarded
3	9	2	16	Blue	Before	Left	Unrewarded	Unrewarded
6	20	0	10	Blue	After	Left	Unrewarded	Rewarded
16	2	12	5	Blue	After	Right	Rewarded	Unrewarded
9	10	4	14	Blue	Before	Right	Rewarded	Rewarded
20	0	3	12	Blue	Before	Right	Rewarded	Rewarded
4	6	4	23	Blue	Before	Right	Rewarded	Rewarded
10	8	2	17	Blue	After	Right	Unrewarded	Rewarded
5	15	0	11	Blue	Before	Left	Rewarded	Unrewarded
3	18	10	12	Blue	After	Left	Unrewarded	Rewarded
